# Supplementary material
Source: PubMed Central journal article supplement (PMC7416432)
Supplement: NIHMS1585801-supplement-10439_2020_2507_MOESM1_ESM.pdf [file NIHMS1585801-supplement-10439_2020_2507_MOESM1_ESM.pdf]

## SUPPLEMENTARY TABLES

**Table S1. Lasers and filter sets used for sorts.**

| <b>Antibody to be detected</b>  | <b>Laser</b> | <b>Filter Set</b> |
|---------------------------------|--------------|-------------------|
| DAPI                            | 355 nm       | 460/50 nm         |
| O1/BV421                        | 405 nm       | 460/50 nm         |
| Reference channel (no antibody) | 488 nm       | 528/38 nm         |
| TUBB3-555                       | 561 nm       | 593/40 nm         |
| GFAP-647                        | 640 nm       | 670/30 nm         |

**Table S2. Post-sort event, cell, and protein yield for neural cell types isolated from non-symptomatic and Alzheimer's disease brain.** Counts, calculated using a hemocytometer, were based on single cells (i.e., no clumps were included). AD-severe diagnosis indicates Braak staging of VI/VI. Sorting runs used all cells isolated from a given donor sample (see Table S2).

| Donor # | Diagnosis | Cell Population | Event Count         | Cell Count          | Protein Yield (µg) |
|---------|-----------|-----------------|---------------------|---------------------|--------------------|
| 1       | NS        | Unsorted        | 1x10 <sup>6</sup>   | 1.3x10 <sup>6</sup> | 13.9               |
| 1       | NS        | O1+             | 2.4x10 <sup>4</sup> | --                  | --                 |
| 1       | NS        | TUBB3+          | 9.4x10 <sup>5</sup> | 1.4x10 <sup>6</sup> | 8.7                |
| 1       | NS        | GFAP+           | 7.1x10 <sup>5</sup> | 5.8x10 <sup>5</sup> | 10.3               |
| 1       | NS        | Myelin debris   | --                  | --                  | 145                |
| 2       | NS        | Unsorted        | 5.5x10 <sup>5</sup> | 4.6x10 <sup>5</sup> | 5.0                |
| 2       | NS        | O1+             | 1x10 <sup>5</sup>   | --                  | --                 |
| 2       | NS        | TUBB3+          | 3x10 <sup>5</sup>   | 4.4x10 <sup>5</sup> | 6.8                |
| 2       | NS        | GFAP+           | 6.2x10 <sup>5</sup> | 1.1x10 <sup>6</sup> | 4.5                |
| 2       | NS        | Myelin debris   | --                  | --                  | 170                |
| 3       | NS        | Unsorted        | 5x10 <sup>5</sup>   | 5.7x10 <sup>5</sup> | 9.8                |
| 3       | NS        | O1+             | 8.3x10 <sup>4</sup> | --                  | --                 |
| 3       | NS        | TUBB3+          | 2.5x10 <sup>5</sup> | 2.9x10 <sup>5</sup> | 5.5                |
| 3       | NS        | GFAP+           | 3.2x10 <sup>6</sup> | 2.7x10 <sup>6</sup> | 24.8               |
| 3       | NS        | Myelin debris   | --                  | --                  | 178                |
| 4       | AD-severe | Unsorted        | 1x10 <sup>6</sup>   | 1.3x10 <sup>6</sup> | 14.3               |
| 4       | AD-severe | O1+             | 5.7x10 <sup>4</sup> | --                  | --                 |
| 4       | AD-severe | TUBB3+          | 1x10 <sup>6</sup>   | 1.1x10 <sup>6</sup> | 11.8               |
| 4       | AD-severe | GFAP+           | 8x10 <sup>5</sup>   | 2.7x10 <sup>5</sup> | 5.3                |
| 4       | AD-severe | Myelin debris   | --                  | --                  | 127                |
| 5       | AD-severe | Unsorted        | 1x10 <sup>6</sup>   | 1.6x10 <sup>6</sup> | 13.7               |
| 5       | AD-severe | O1+             | 1.7x10 <sup>4</sup> | --                  | --                 |
| 5       | AD-severe | TUBB3+          | 1.3x10 <sup>6</sup> | 1.5x10 <sup>6</sup> | 11.6               |
| 5       | AD-severe | GFAP+           | 4.8x10 <sup>5</sup> | 6.3x10 <sup>5</sup> | 7.8                |
| 5       | AD-severe | Myelin debris   | --                  | --                  | 119                |
| 6       | AD-severe | Unsorted        | 5x10 <sup>5</sup>   | 1.1x10 <sup>6</sup> | 8.0                |
| 6       | AD-severe | O1+             | 1.4x10 <sup>5</sup> | --                  | --                 |
| 6       | AD-severe | TUBB3+          | 1.1x10 <sup>6</sup> | 7.4x10 <sup>5</sup> | 8.6                |
| 6       | AD-severe | GFAP+           | 1.2x10 <sup>6</sup> | 1.6x10 <sup>6</sup> | 11.8               |
| 6       | AD-severe | Myelin debris   | --                  | --                  | 168                |

**Table S3. Lasers and filter sets used for confocal imaging.**

| <b>Laser</b>  | <b>Nikon AIR Multiphoton microscope settings</b> | <b>Zeiss LSM800 with Airyscan confocal microscope settings</b> |
|---------------|--------------------------------------------------|----------------------------------------------------------------|
| <b>405 nm</b> | 425-475 nm PMT; HV 100, Offset -15, Power 4.50   | Pinhole 37 $\mu\text{m}$ , Offset 0, Gain 725V                 |
| <b>488 nm</b> | N/A                                              | Pinhole 44 $\mu\text{m}$ , Offset 0, Gain 725V                 |
| <b>561 nm</b> | 570-620 nm GaAsP; HV 80, Offset -15, Power 0.25  | Pinhole 51 $\mu\text{m}$ , Offset 0, Gain 700V                 |
| <b>640 nm</b> | N/A                                              | Pinhole 56 $\mu\text{m}$ , Offset 0, Gain 750V                 |
| <b>655 nm</b> | 663-738 nm PMT; HV 120, Offset -15, Power 3.50   | N/A                                                            |

**Table S4. Top 50 proteins identified from fresh and PFA-fixed rat brain cells.** Listed proteins are ranked by abundance for fresh samples (left columns) and PFA samples (right columns). Units for quantified proteins are averaged spectrum counts.

| <i>Top 50 Proteins for Fresh Condition</i> |                                                                 |                                                               | <i>Top 50 Proteins for PFA Condition</i> |                                                               |                                                                 |
|--------------------------------------------|-----------------------------------------------------------------|---------------------------------------------------------------|------------------------------------------|---------------------------------------------------------------|-----------------------------------------------------------------|
| <b>Protein Name</b>                        | <b>Fresh<br/>Condition<br/>Averaged<br/>Spectrum<br/>Counts</b> | <b>PFA<br/>Condition<br/>Averaged<br/>Spectrum<br/>Counts</b> | <b>Protein Name</b>                      | <b>PFA<br/>Condition<br/>Averaged<br/>Spectrum<br/>Counts</b> | <b>Fresh<br/>Condition<br/>Averaged<br/>Spectrum<br/>Counts</b> |
| SPTA1                                      | 68.80                                                           | 46.47                                                         | PRPF8                                    | 82.07                                                         | 57.80                                                           |
| SPTB                                       | 66.67                                                           | 37.67                                                         | SNRNP200                                 | 67.40                                                         | 49.13                                                           |
| PRPF8                                      | 57.80                                                           | 82.07                                                         | NUMA1                                    | 62.73                                                         | 31.80                                                           |
| SNRNP200                                   | 49.13                                                           | 67.40                                                         | TPR                                      | 56.73                                                         | 28.73                                                           |
| LMNA                                       | 46.73                                                           | 50.53                                                         | DHX9                                     | 52.60                                                         | 42.80                                                           |
| DHX9                                       | 42.80                                                           | 52.60                                                         | LMNA                                     | 50.53                                                         | 46.73                                                           |
| HNRNPM                                     | 42.13                                                           | 50.27                                                         | HNRNPM                                   | 50.27                                                         | 42.13                                                           |
| LMNB1                                      | 40.67                                                           | 45.33                                                         | SF3B1                                    | 46.67                                                         | 30.20                                                           |
| MATR3                                      | 34.60                                                           | 42.20                                                         | SPTA1                                    | 46.47                                                         | 68.80                                                           |
| LMNB2                                      | 33.13                                                           | 36.47                                                         | LMNB1                                    | 45.33                                                         | 40.67                                                           |
| NUMA1                                      | 31.80                                                           | 62.73                                                         | RANBP2                                   | 44.67                                                         | 27.87                                                           |
| SF3B1                                      | 30.20                                                           | 46.67                                                         | MATR3                                    | 42.20                                                         | 34.60                                                           |
| HBB                                        | 29.00                                                           | 20.93                                                         | TUBB4A                                   | 40.73                                                         | 26.73                                                           |
| TPR                                        | 28.73                                                           | 56.73                                                         | SUGP2                                    | 39.00                                                         | 26.27                                                           |
| SLC4A1                                     | 28.53                                                           | 25.73                                                         | SPTB                                     | 37.67                                                         | 66.67                                                           |
| ANK1                                       | 28.00                                                           | 21.67                                                         | ATP2A2                                   | 37.07                                                         | 22.33                                                           |
| HNRNPL                                     | 27.93                                                           | 33.27                                                         | EFTUD2                                   | 36.87                                                         | 25.87                                                           |
| RANBP2                                     | 27.87                                                           | 44.67                                                         | LMNB2                                    | 36.47                                                         | 33.13                                                           |
| HSPA8                                      | 27.87                                                           | 32.20                                                         | SF3B3                                    | 34.53                                                         | 25.80                                                           |
| HNRNPU                                     | 26.73                                                           | 34.33                                                         | NUP205                                   | 34.47                                                         | 21.73                                                           |
| TUBB4A                                     | 26.73                                                           | 40.73                                                         | HNRNPU                                   | 34.33                                                         | 26.73                                                           |
| HNRNPUL2                                   | 26.47                                                           | 34.27                                                         | HNRNPUL2                                 | 34.27                                                         | 26.47                                                           |
| YWHAE                                      | 26.40                                                           | 26.20                                                         | DDX5                                     | 34.00                                                         | 25.13                                                           |
| SUGP2                                      | 26.27                                                           | 39.00                                                         | HNRNPL                                   | 33.27                                                         | 27.93                                                           |
| EFTUD2                                     | 25.87                                                           | 36.87                                                         | HSPA8                                    | 32.20                                                         | 27.87                                                           |
| SF3B3                                      | 25.80                                                           | 34.53                                                         | ILF3                                     | 30.93                                                         | 25.27                                                           |
| MYEF2                                      | 25.60                                                           | 30.13                                                         | NUP210                                   | 30.40                                                         | 17.93                                                           |
| HNRNPA2B1                                  | 25.40                                                           | 27.87                                                         | MYEF2                                    | 30.13                                                         | 25.60                                                           |
| ILF3                                       | 25.27                                                           | 30.93                                                         | TRIM28                                   | 30.00                                                         | 22.33                                                           |
| DDX5                                       | 25.13                                                           | 34.00                                                         | ZFR                                      | 29.60                                                         | 20.60                                                           |
| ACTB                                       | 24.47                                                           | 23.87                                                         | HSPA5                                    | 29.40                                                         | 24.07                                                           |
| HSPA5                                      | 24.07                                                           | 29.40                                                         | TP53BP1                                  | 29.33                                                         | 13.93                                                           |
| HNRNPA1                                    | 22.60                                                           | 24.93                                                         | NONO                                     | 29.00                                                         | 21.60                                                           |
| HNRNPA3                                    | 22.33                                                           | 24.13                                                         | NUP98                                    | 28.80                                                         | 18.20                                                           |
| TRIM28                                     | 22.33                                                           | 30.00                                                         | DDX17                                    | 28.60                                                         | 22.33                                                           |
| ATP2A2                                     | 22.33                                                           | 37.07                                                         | KRT1                                     | 28.53                                                         | 16.07                                                           |
| DDX17                                      | 22.33                                                           | 28.60                                                         | SRRM2                                    | 28.40                                                         | 14.73                                                           |
| HP1BP3                                     | 22.07                                                           | 26.53                                                         | NUP93                                    | 28.27                                                         | 18.07                                                           |
| NUP205                                     | 21.73                                                           | 34.47                                                         | ATP1A1                                   | 28.07                                                         | 10.20                                                           |
| NONO                                       | 21.60                                                           | 29.00                                                         | SMARCA5                                  | 28.00                                                         | 13.07                                                           |
| MECP2                                      | 21.33                                                           | 27.20                                                         | HNRNPA2B1                                | 27.87                                                         | 25.40                                                           |
| SFPQ                                       | 21.00                                                           | 24.40                                                         | SMARCA2                                  | 27.87                                                         | 11.40                                                           |
| ANXA3                                      | 20.87                                                           | 20.40                                                         | SMARCC2                                  | 27.47                                                         | 11.60                                                           |
| NOP56                                      | 20.67                                                           | 23.80                                                         | RBM14                                    | 27.27                                                         | 18.40                                                           |
| ZFR                                        | 20.60                                                           | 29.60                                                         | MECP2                                    | 27.20                                                         | 21.33                                                           |
| HBA1                                       | 20.47                                                           | 11.07                                                         | ATP5F1B                                  | 26.60                                                         | 17.27                                                           |
| CAMK2A                                     | 19.67                                                           | 20.67                                                         | HP1BP3                                   | 26.53                                                         | 22.07                                                           |
| RBMXRTL                                    | 19.20                                                           | 22.73                                                         | CDC5L                                    | 26.27                                                         | 14.93                                                           |
| HNRNPR                                     | 19.00                                                           | 23.67                                                         | YWHAE                                    | 26.20                                                         | 26.40                                                           |
| HNRNPK                                     | 18.73                                                           | 22.80                                                         | NUP133                                   | 26.00                                                         | 14.00                                                           |

## SUPPLEMENTARY FIGURES

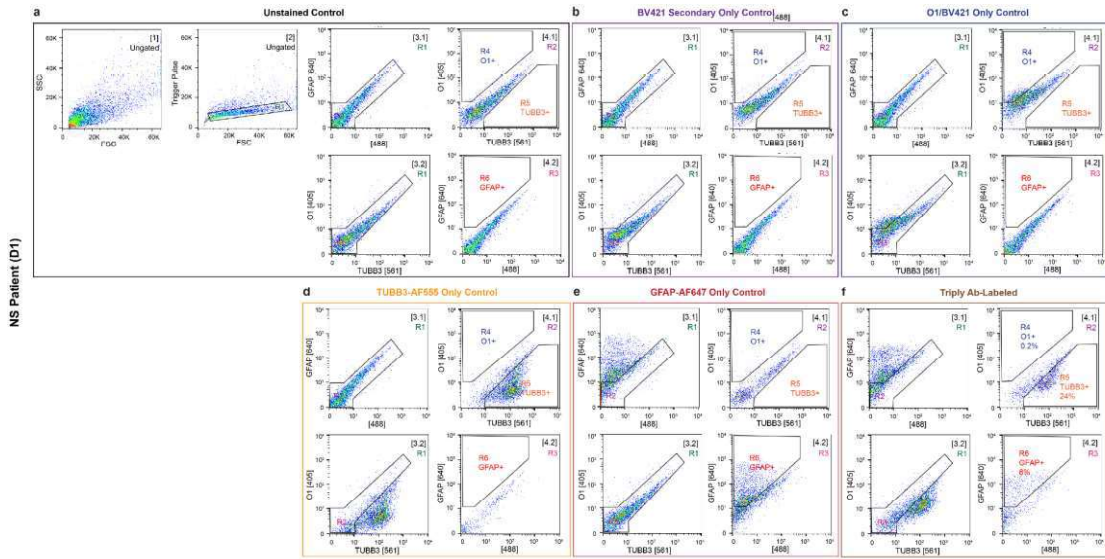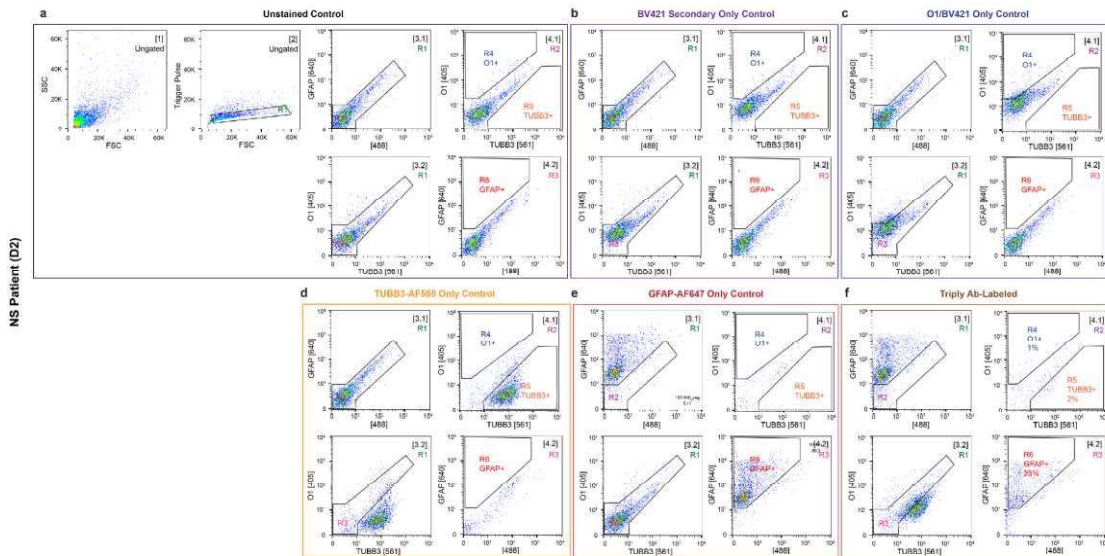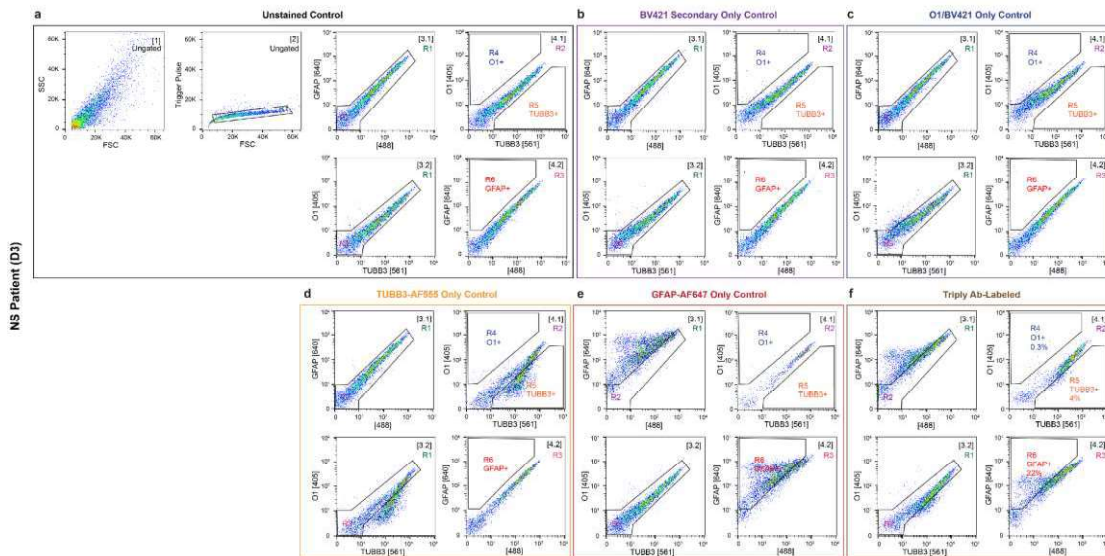

**Figure S1. Multi-color fluorescence-activated cell sorting of heterogeneous brain cell populations from non-symptomatic patients.** All gating was established based on (a) unstained controls, was validated with (b) secondary only and (c-e) single stain controls, and was finally applied to (f) triply antibody-labeled experimental conditions. The gating strategy is as follows: [1] Distribution of events based on forward (FSC) and side (SSC) scatter properties. [2] Trigger pulse width assessment to exclude doublet/triplet events. “R1” gate represented singlet detection, which was then applied to initial bivariate gating schemes. [3] Bivariate assessment of fluorescence channels. Gating encompassed baseline autofluorescence (“R2” and “R3”) and was subsequently applied to secondary bivariate gating schemes. Channel 488 was used as a placeholder for bivariate delineation. [4] Final detection of singly positive O1+ (blue), TUBB3+ (orange) populations [4.1], or GFAP+ (red) population [4.2]. Abbreviations: Ab, antibody; BV, Brilliant Violet; D, donor; FSC, forward scatter; R#, region; SSC, side scatter.

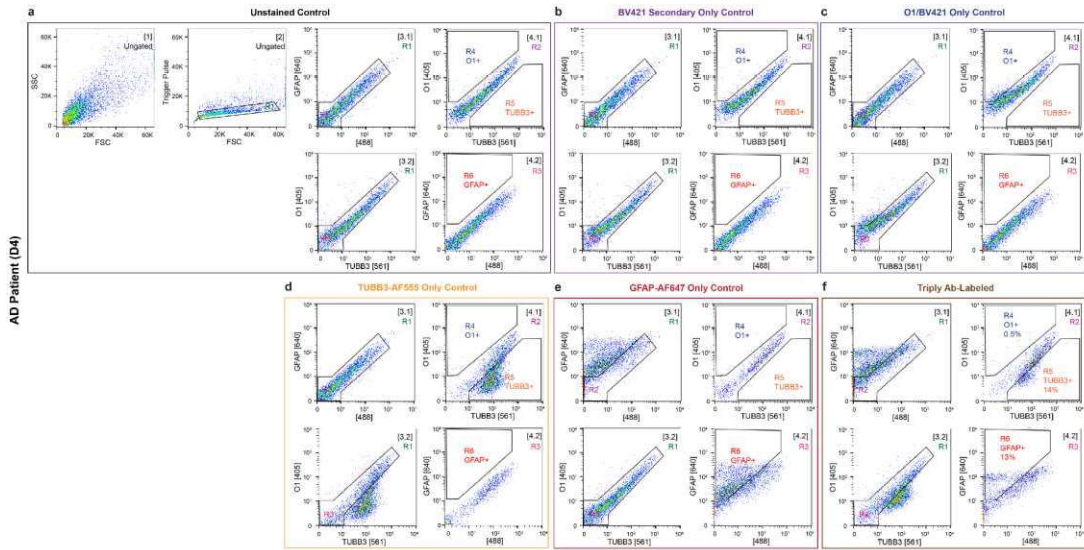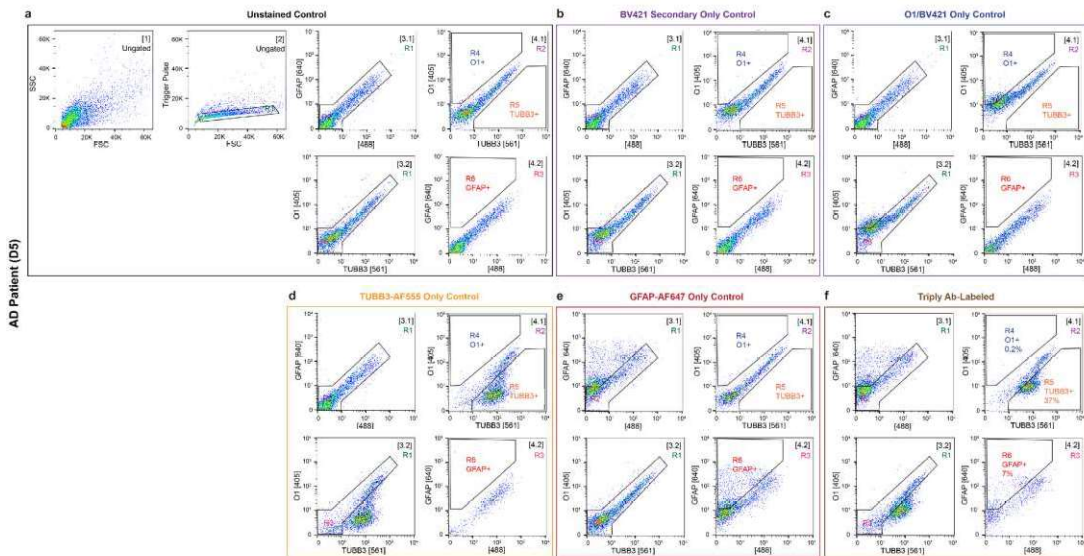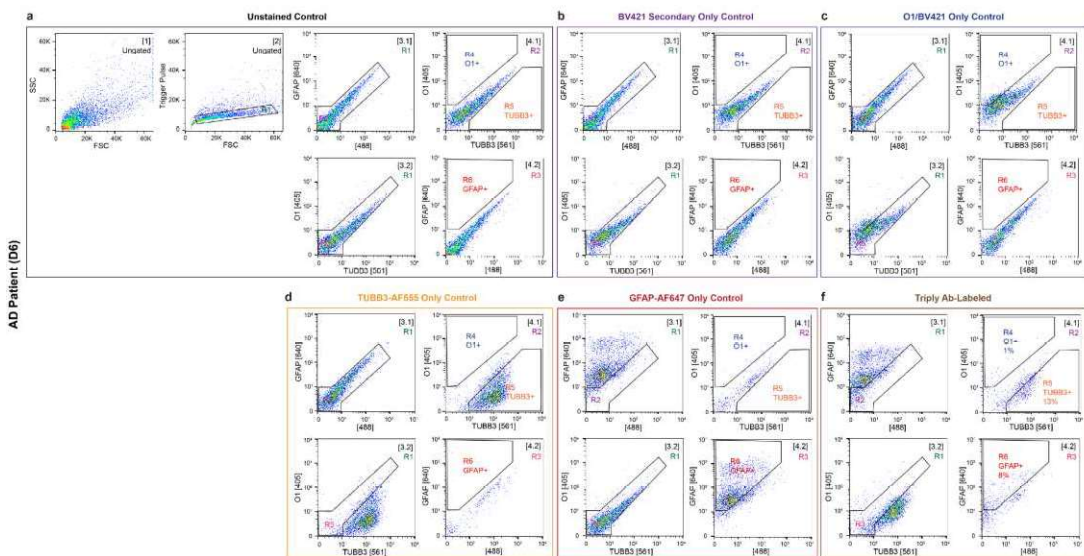



**Figure S2. Multi-color fluorescence-activated cell sorting of heterogeneous brain cell populations from Alzheimer's disease patients.** All gating was established based on (a) unstained controls, was validated with (b) secondary only and (c-e) single stain controls, and was finally applied to (f) triply antibody-labeled experimental conditions. The gating strategy is as follows: [1] Distribution of events based on forward (FSC) and side (SSC) scatter properties. [2] Trigger pulse width assessment to exclude doublet/triplet events. "R1" gate represented singlet detection, which was then applied to initial bivariate gating schemes. [3] Bivariate assessment of fluorescence channels. Gating encompassed baseline autofluorescence ("R2" and "R3") and was subsequently applied to secondary bivariate gating schemes. Channel 488 was used as a placeholder for bivariate delineation. [4] Final detection of singly positive O1+ (blue), TUBB3+ (orange) populations [4.1], or GFAP+ (red) population [4.2]. Abbreviations: Ab, antibody; BV, Brilliant Violet; D, donor; FSC, forward scatter; R#, region; SSC, side scatter.

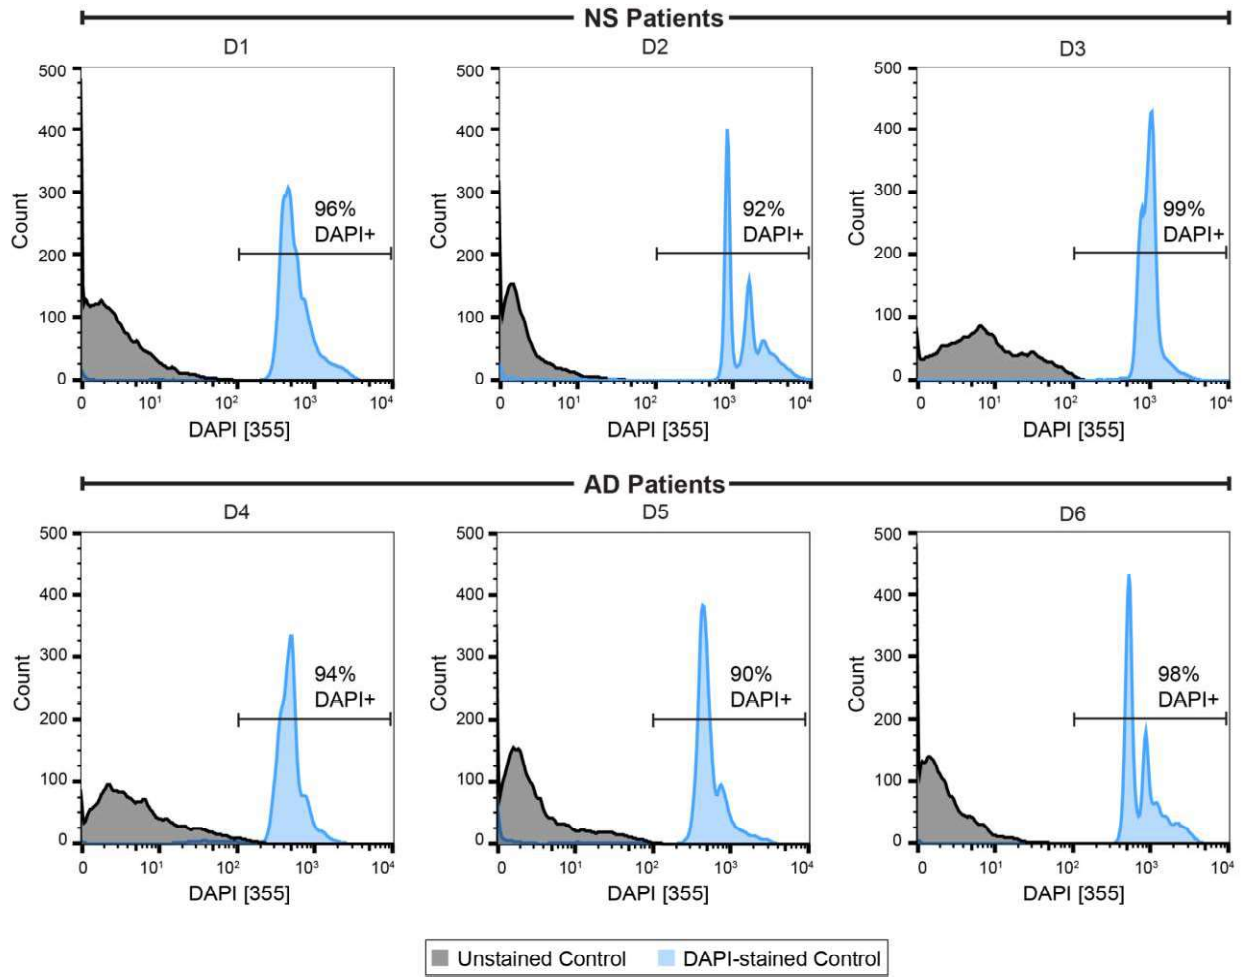

**Figure S3. Flow cytometry analysis of DAPI-stained donor samples.** Each histogram depicts an unstained control (grey) and a DAPI-stained sample (blue). Percentages of DAPI+ events are listed for each donor.

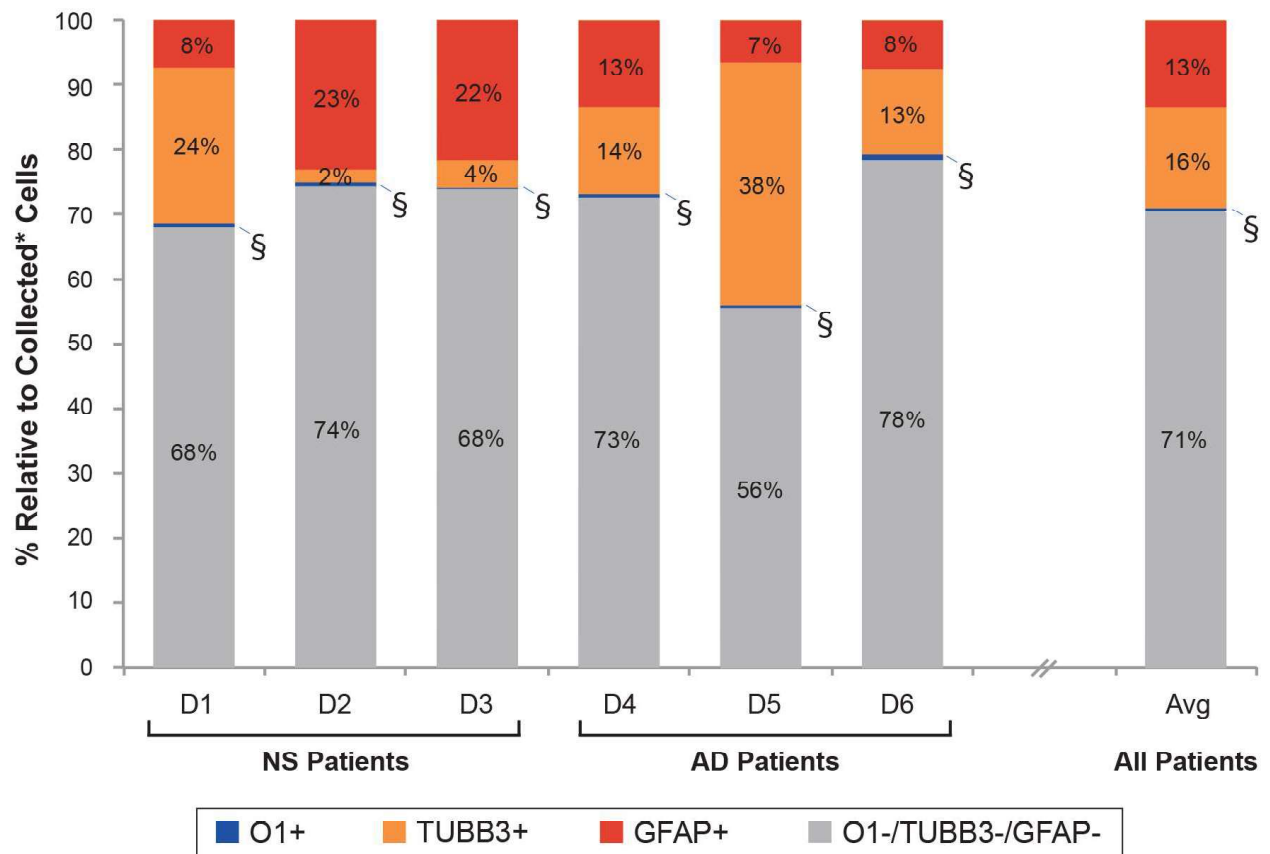

**Figure S4. Proportions of individual cell types collected from non-symptomatic and Alzheimer's disease donors by fluorescence-activated cell sorting.** Raw data are presented for each donor sample, and mean data are presented for all patients combined. O1 cell populations (§) made up <1% of cell total in all donors assessed. A 2-way ANOVA was performed to determine significance among disease states ( $P = 1$ ), cell types ( $P < 0.001$ ), and interactions between factors ( $P = 0.082$ ). D, donor; Avg, average. Abbreviations: R#, region #; y.o., years old.

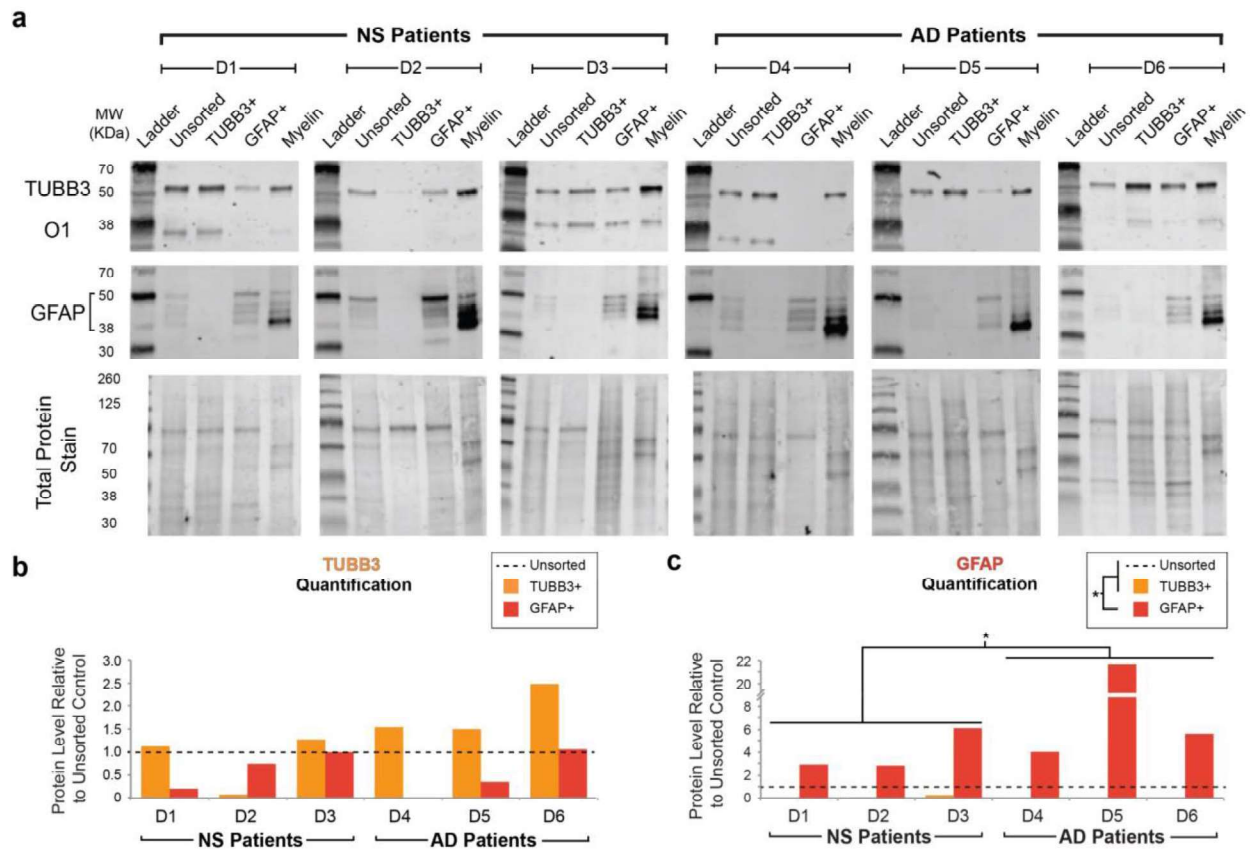

**Figure S5. Western blots supported validity of successful neural cell enrichment for neurons (TUBB3+) and astrocytes (GFAP+) isolated from non-symptomatic and Alzheimer's disease brain.** Donors 1 and 4 were shown in main Figure 3e. (a) Western blots of post-FACS, collected cell populations and myelin debris protein lysates for non-symptomatic (NS) and Alzheimer's disease (AD) donors 2 and 3, assessing TUBB3 (55 kDa), O1 (35 kDa), GFAP (38-50 kDa), and Total Protein Stain. Densitometry-based quantification of (b) TUBB3 and (c) GFAP (50 kDa isoform). Dashed line indicates the normalized unsorted control protein level. 2-way ANOVA were performed to determine significance among disease states, cell types, and interactions between factors (\* denotes a statistically significant difference for indicated comparison,  $P < 0.005$ ).

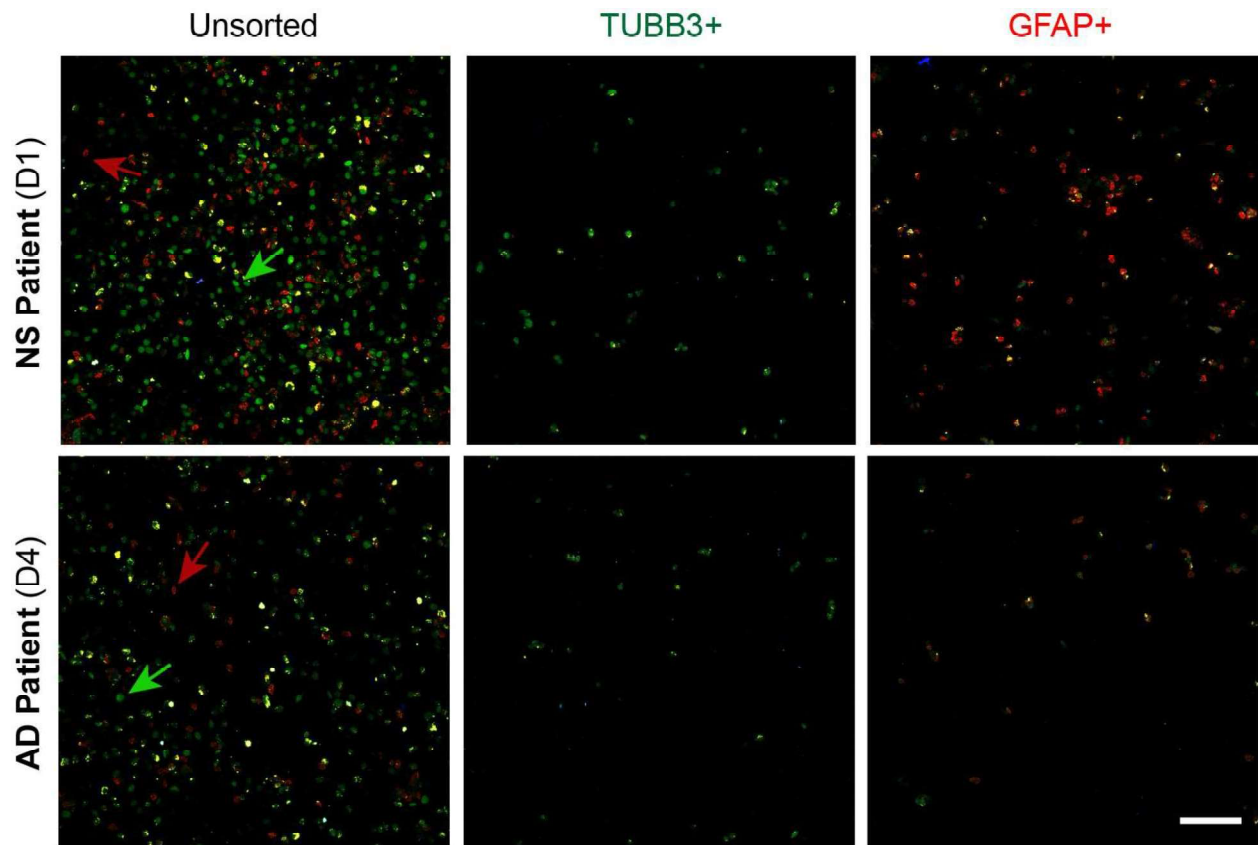

**Figure S6. Low magnification confocal images of unsorted, neurons (TUBB3+), and astrocytes (GFAP+) from non-symptomatic and Alzheimer's disease brain.** Green, TUBB3 protein; Red, GFAP protein; Yellow, overlap between TUBB3+ and GFAP+ protein. Arrows highlight cells types of interest. Scale bar, 100  $\mu$ m.

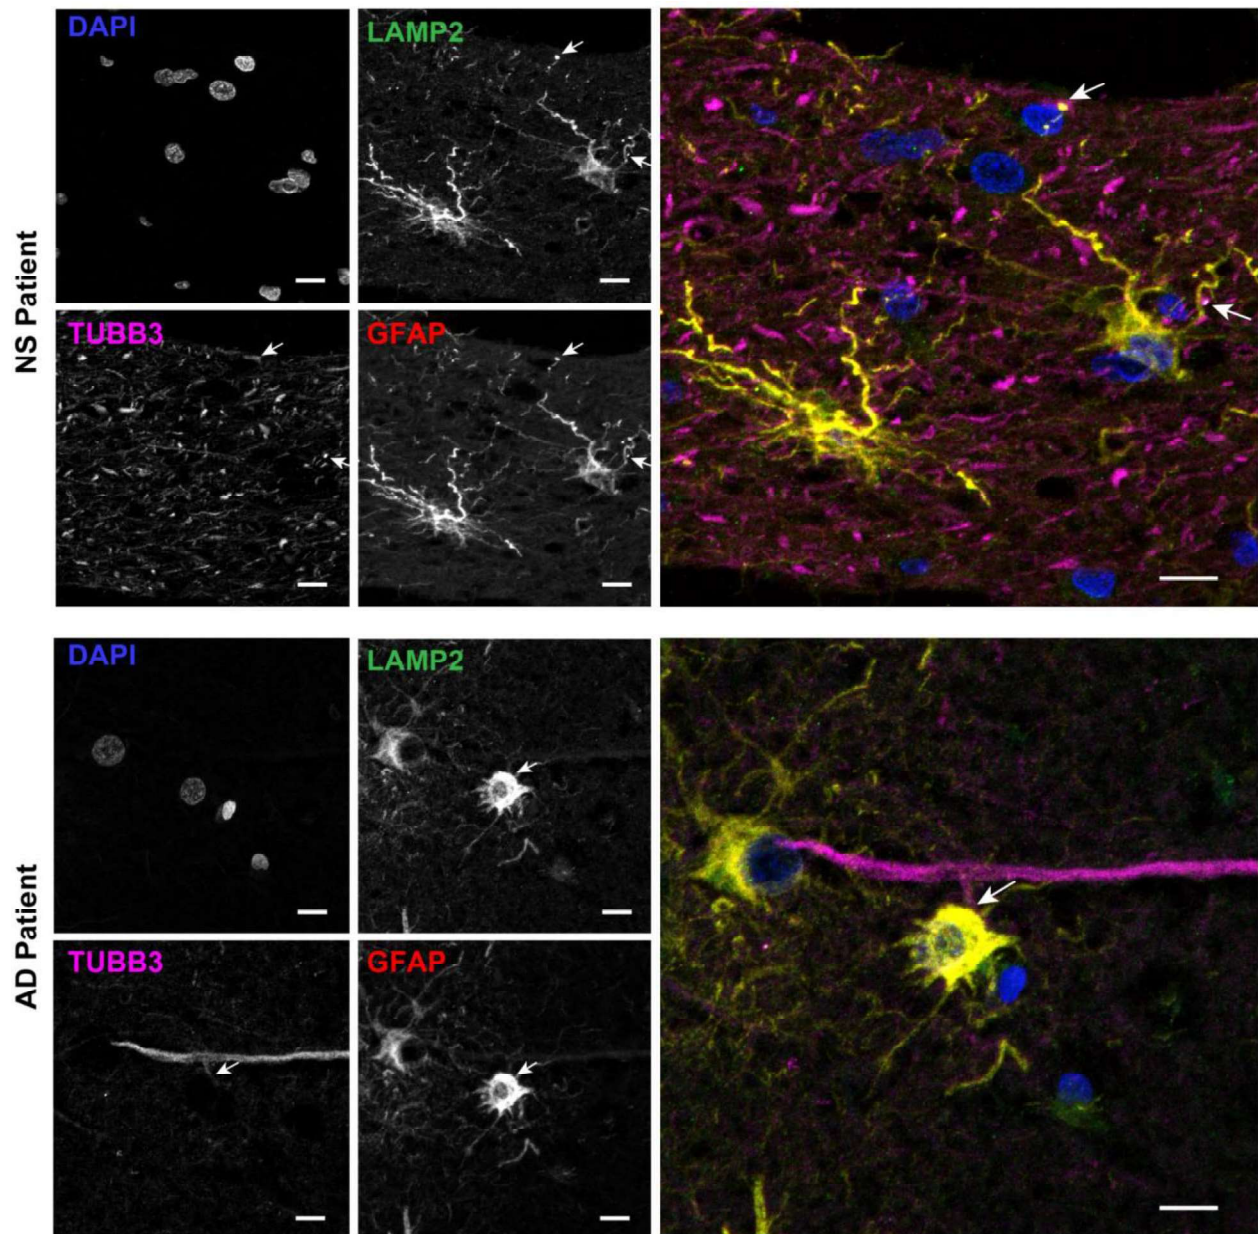

**Figure S7. High magnification confocal images of non-symptomatic and Alzheimer's disease brain tissue sections.** Blue, DAPI; Green, LAMP2 protein; Magenta, TUBB3 protein; Red, GFAP protein. Arrows highlight TUBB3 protein localization to LAMP2+ lysosomes in GFAP+ astrocytes. Scale bars, 10  $\mu$ m.
